# Supplementary material
Source: PubMed Central journal article supplement (PMC3172697)
Supplement: NIHMS322052-supplement-supplement_1.pdf [file NIHMS322052-supplement-supplement_1.pdf]

## SUPPLEMENTAL FIGURE LEGENDS

**Supplemental Figure 1. CO ameliorates histologic colitis in  $TCR\alpha^{-/-}$  mice.**  $TCR\alpha^{-/-}$  mice were housed in ambient air or a chamber maintaining a constant concentration of CO at 250 ppm ( $n=10$  each) from 12 to 16 weeks of age. Representative hematoxylin and eosin staining and depiction of histologic colitis of  $TCR\alpha^{-/-}$  colonic tissues. Top panel, ambient air; Bottom panel, CO-treated (magnification at 40X). Colons of inflamed 16 week old  $TCR\alpha^{-/-}$  mice housed in ambient air have elongated crypts, thickened mucosal and submucosal layers with transmural inflammation compared to CO exposed mice. Infiltrates are predominantly lymphocytes and monocytes with few neutrophils.

**Supplemental Figure 2. Surface marker expression in mononuclear cell populations from  $TCR\alpha^{-/-}$  mice.** Colonic LPMCs from ALF186 (30 mg/kg) and iALF186 (30 mg/kg) treated  $TCR\alpha^{-/-}$  mice were labeled with antibodies against (A) macrophage activation markers, F4/80, CD14, CD80 in  $CD11b^{+}$  gated LPMCs (B) CD1d expression for B cells gated on  $B220^{+}$  LPMCs. Dead cells were excluded with propidium iodide staining. Representative staining patterns of LPMCs harvested from 4 individual mice is shown. (C) Splenocytes from WT and  $TCR\alpha^{-/-}$  mice were isolated and pooled ( $n=3$ ) and were labeled with antibodies against CD4 followed by intracellular cytokine staining for FoxP3. Representative pattern of splenocyte staining from 3 individual mice is shown.

**Supplemental Figure 3. *Hmox* and *Il10* induction in LPMC from CORM-186 treated WT mice.** LPMCs were isolated from colons of WT mice treated with inactive CO-releasing molecule 186 (iALF186,  $n=4$ , white bars) and ALF186 ( $n=4$ , black bars). LPMCs were further separated into  $CD11b^{-}$  and  $CD11b^{+}$  cells and analyzed for (A) *Hmox1* (B) and *Il10* expression by real-time RT-PCR. Results were normalized to  $\beta$ -actin. Error bars represent mean $\pm$ SEM triplicate cultures from pooled LPMCs from

four mice per group.  $p < 0.05$  vs. iALF186 treated CD11b<sup>+</sup> LPMCs.

**FIGURE 4. Regulation of IL-10 in macrophages is MyD88 dependent.** WT and MYD88<sup>-/-</sup> BMMs were stimulated with LPS (100 ng/mL), CpG (1  $\mu$ M), SbLP (100 ng/mL), and flagellin (10 ng/mL) for 24 hours. IL-10 protein was analyzed by ELISA. Data is representative of 3 independent experiments. Error bars represent mean  $\pm$  SEM from 3 independent experiments.  $p < 0.05$  vs. WT simulated BMMs.

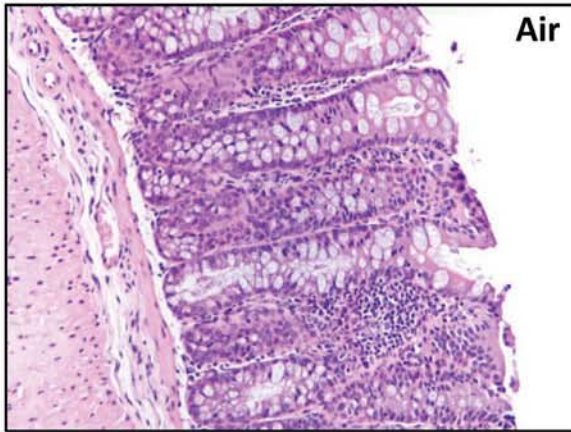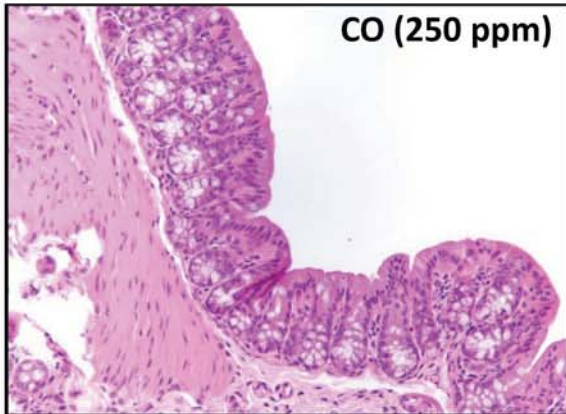

**Supplemental Figure 1**

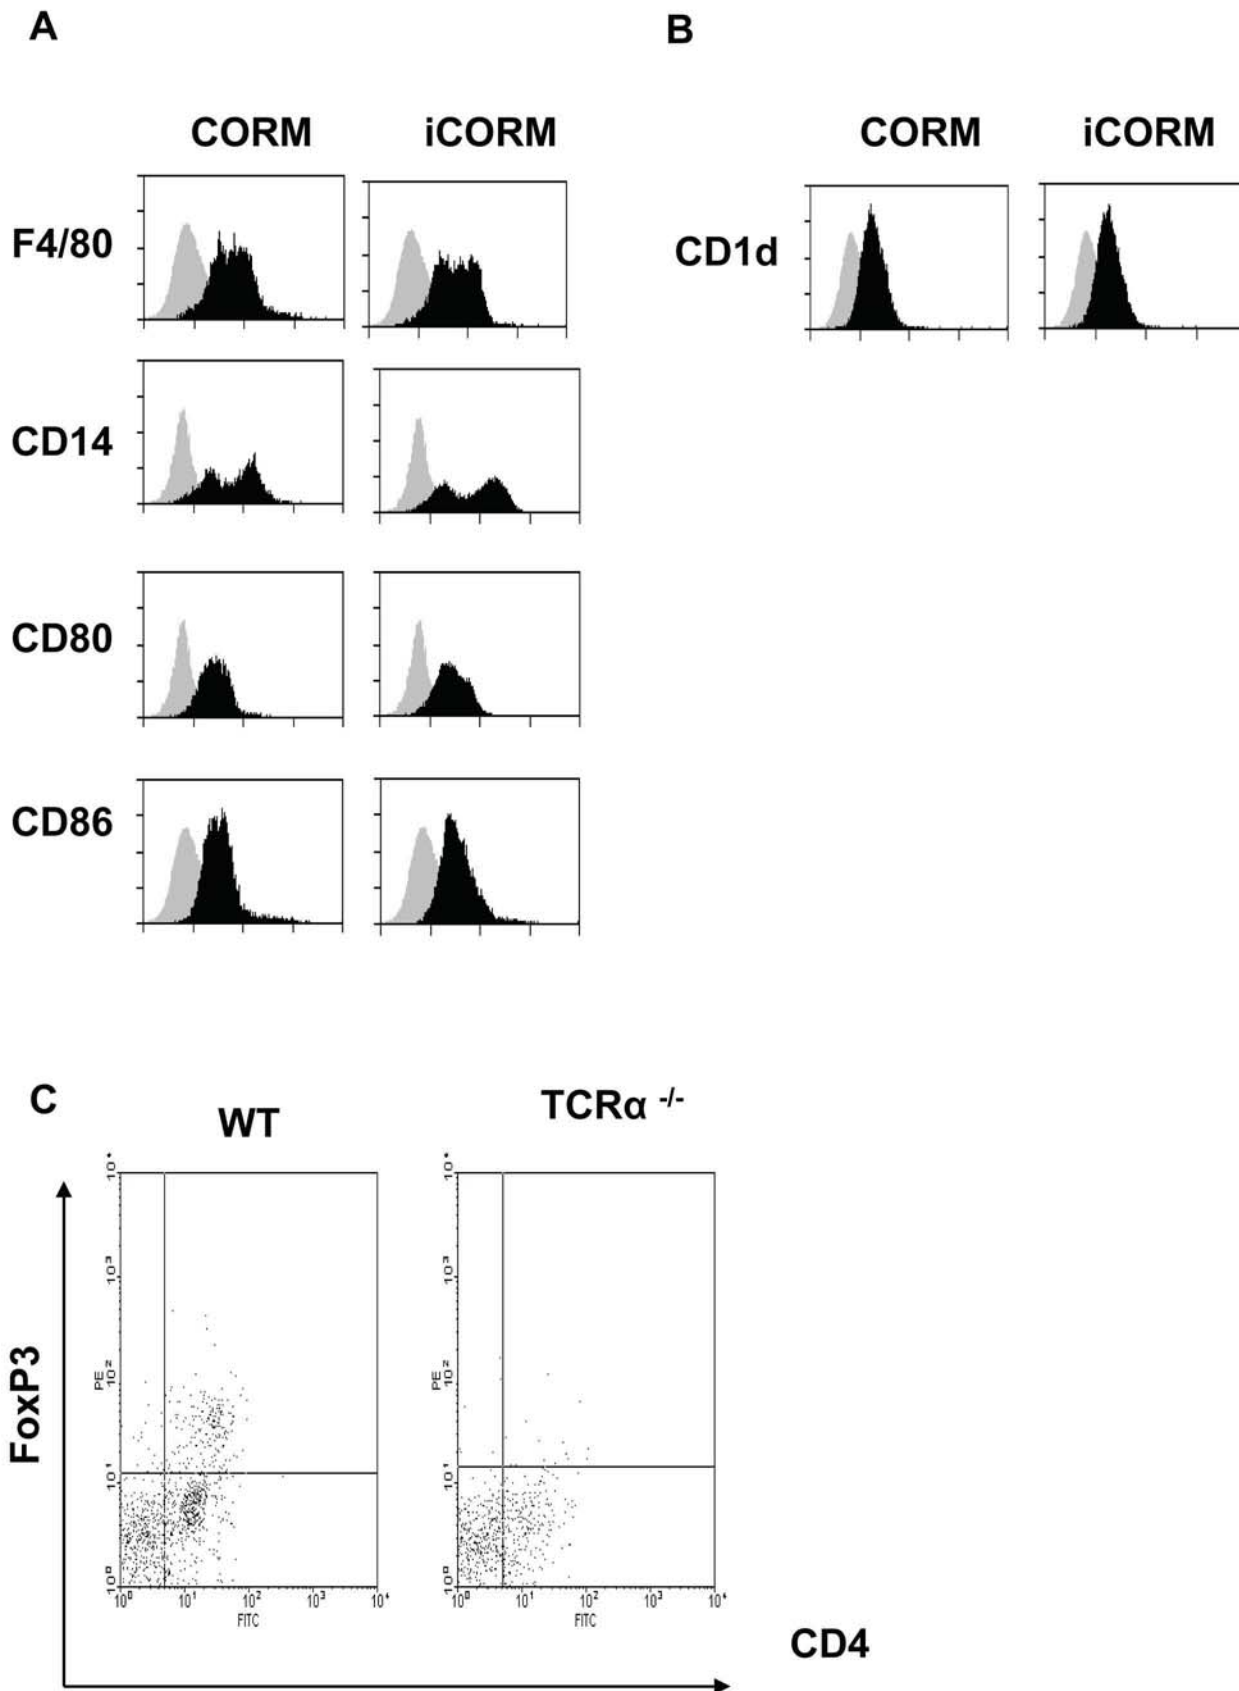

Supplemental Figure 2

**A**

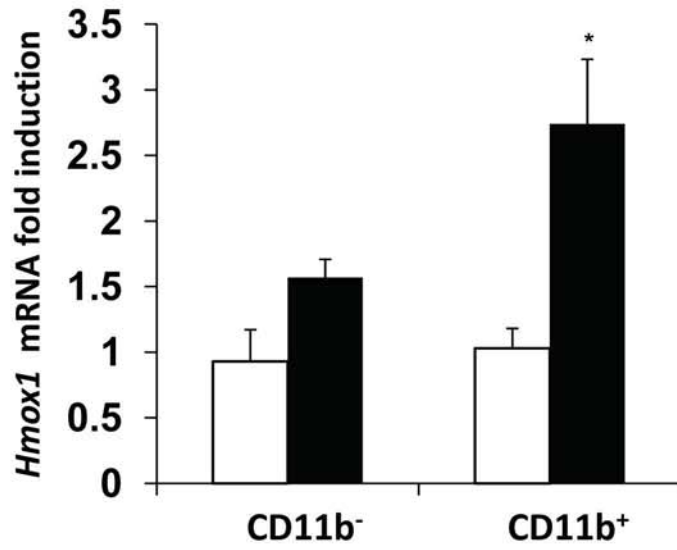

**B**

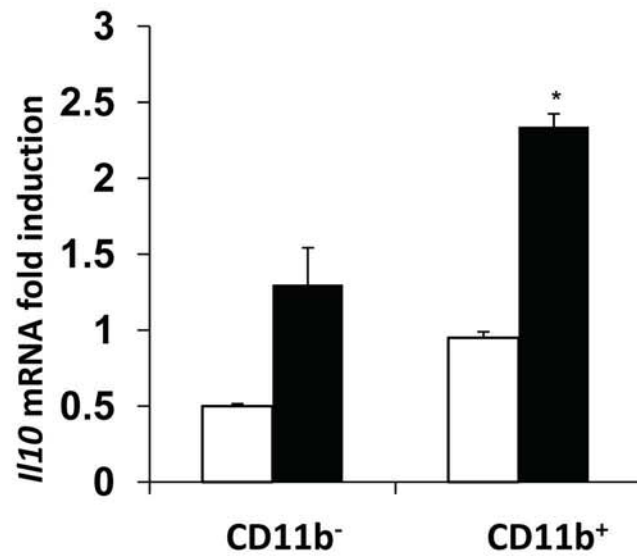

**Supplemental Figure 3**

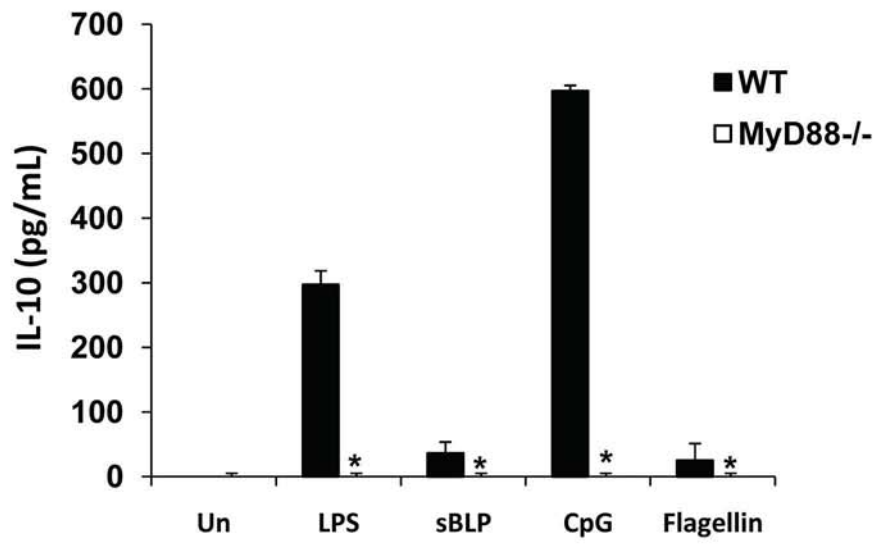

**Supplemental Figure 4**
